# Supplementary material for: The role of N-glycans of HIV-1 gp41 in virus infectivity and susceptibility to the suppressive effects of carbohydrate-binding agents
Source: PubMed Central journal article supplement (PMC4269863; doi:10.1186/s12977-014-0107-7), 2014-12-11

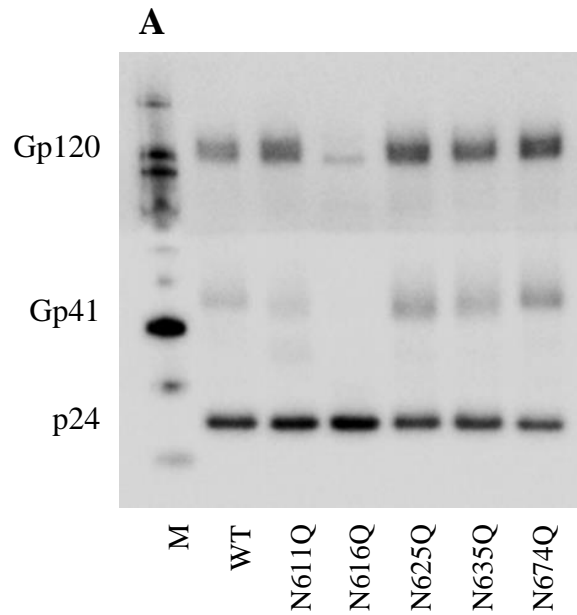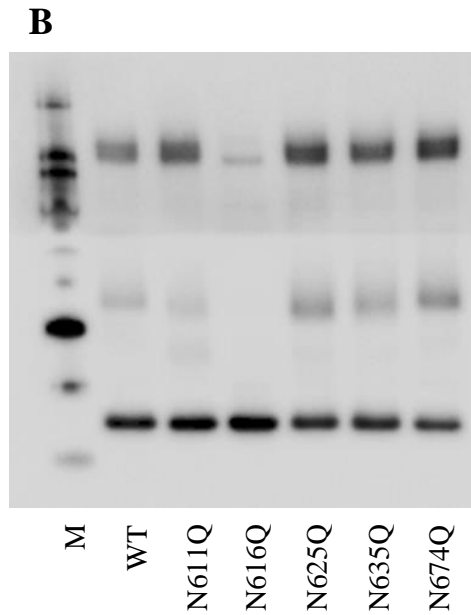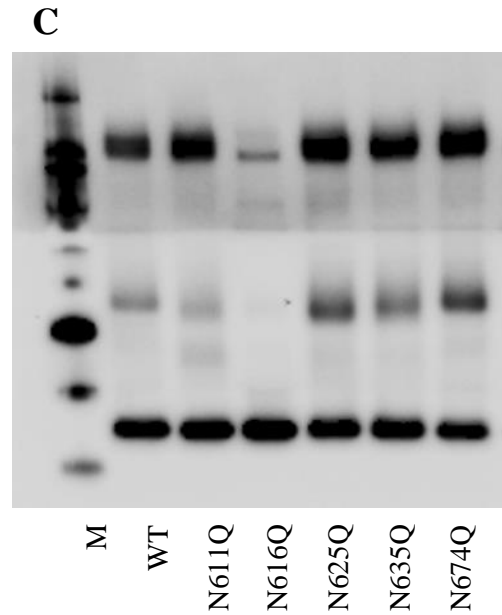

Supplement: 12977_2014_107_MOESM1_ESM.pdf [file 12977_2014_107_MOESM1_ESM.pdf]
