# Supplementary material for: The role of N-glycans of HIV-1 gp41 in virus infectivity and susceptibility to the suppressive effects of carbohydrate-binding agents
Source: PubMed Central journal article supplement (PMC4269863; doi:10.1186/s12977-014-0107-7), 2014-12-11
Supplement: 12977_2014_107_MOESM2_ESM.pdf [file 12977_2014_107_MOESM2_ESM.pdf]

**Table S1. Oligonucleotide sequences of the primers used for cloning, site-directed mutagenesis and sequencing of gp41.**

| Primer                        | Nucleotide sequence                                    | Description                                                                |
|-------------------------------|--------------------------------------------------------|----------------------------------------------------------------------------|
| EnvB_EcoRI                    | GTCAGAGAATTCAGAAAGAGCAGAAGACAGTGGCAA<br>TGA            | Forward cloning primer                                                     |
| HIV8726-R_XhoI                | CGT CGT CTC GAG TTG TAC TAC TTC TAT AAC<br>CCT ATC TGT | Reverse cloning primer                                                     |
| Mut_N611Q_F                   | GCT GTG CCT TGG CAA GCT AGT TGG AG                     | Forward mutagenesis primer for N611Q                                       |
| Mut_N611Q_R                   | CTC CAA CTA GCT TGC CAA GGC ACA GC                     | Reverse mutagenesis primer for N611Q                                       |
| Mut_N616Q_F                   | GCT AGT TGG AGT CAA AAA TCT CTG GAA C                  | Forward mutagenesis primer for N616Q                                       |
| Mut_N616Q_R                   | GTT CCA GAG ATT TTT GAC TCC AAC TAG C                  | Reverse mutagenesis primer for N616Q                                       |
| Mut_N625Q_F                   | CAG ATT TGG AAT CAG ATG ACC TGG ATG G                  | Forward mutagenesis primer for N625Q                                       |
| Mut_N625Q_R                   | CCA TCC AGG TCA TCT GAT TCC AAA TCT G                  | Reverse mutagenesis primer for N625Q                                       |
| Mut_N637Q_F                   | CAG AGA AAT TAA CCA ATA CAC AAG CTT AAT AC             | Forward mutagenesis primer for N637Q                                       |
| Mut_N637Q_R                   | GTA TTA AGC TTG TGT ATT GGT TAA TTT CTC TG             | Reverse mutagenesis primer for N637Q                                       |
| Mut_N674Q_F                   | GTT TGT GGA ATT GGT TTC AGA TAA CAA ATT<br>GGC TGT G   | Forward mutagenesis primer for N674Q                                       |
| Mut_N674Q_R                   | CAC AGC CAA TTT GTT ATC TGA AAC CAA TTC<br>CAC AAA C   | Reverse mutagenesis primer for N674Q                                       |
| Mut_N672D_F                   | GTT TGT GGA ATT GGT TTGATA TAA CAA ATT<br>GGC TGT G    | Forward mutagenesis primer for N674D                                       |
| Mut_N672D_R                   | CAC AGC CAA TTT GTT ATA TCA AAC CAA TTC<br>CAC AAA C   | Reverse mutagenesis primer for N674D                                       |
| Mut_N616Q_III <sub>B</sub> _F | GCT AGT TGG AGT CAG AAA TCT CTG GAA C                  | Forward mutagenesis primer for N616Q<br>in gp41 of strain III <sub>B</sub> |
| Mut_N616Q_III <sub>B</sub> _R | GTT CCA GAG ATT TCT GAC TCC AAC TAG C                  | Reverse mutagenesis primer for N616Q<br>in gp41 of strain III <sub>B</sub> |
| Mut_N616Q_ADA_F               | GCT AGT TGG AGT CAG AAA TCC TAC AGT CAG                | Forward mutagenesis primer for N616Q<br>in gp41 of strain ADA              |
| Mut_N616Q_ADA_R               | CTG ACT GTA GGA TTT CTG ACT CCA ACT AGC                | Reverse mutagenesis primer for N616Q<br>in gp41 of strain ADA              |
| Mut_N616Q_HE_F                | CTA GTT GGA GTC AGA AAT CTC TGC                        | Forward mutagenesis primer for N616Q<br>in gp41 of strain HE               |
| Mut_N616Q_HE_R                | GCA GAG ATT TCT GAC TCC AAC TAG                        | Reverse mutagenesis primer for N616Q<br>in gp41 of strain HE               |
| AV324 [1]                     | GGCAAAGAGAAGAGTGGT                                     | Forward sequencing primer                                                  |
| AV329 [1]                     | GTCCCAGAAGTTCCACA                                      | Reverse sequencing primer                                                  |

Primers AV324 and AV329 have been published before in:

1. Van Laethem K, Schrooten Y, Lemey P, Van Wijngaerden E, De Wit S, Van Ranst M, Vandamme AM: **A genotypic resistance assay for the detection of drug resistance in the human immunodeficiency virus type 1 envelope gene.** *J Virol Methods* 2005, **123**:25-34.
